# Supplementary material for: Association of frailty and chronic limb-threatening ischemia in patients on maintenance hemodialysis: a prospective cohort study
Source: publisher site journal article supplement (doi:10.18632/aging.206178), 2024-12-31
Supplement: Supplementary file [file aging-v16i22-206178-supplementary-material-SD1.pdf]

## SUPPLEMENTARY FIGURE

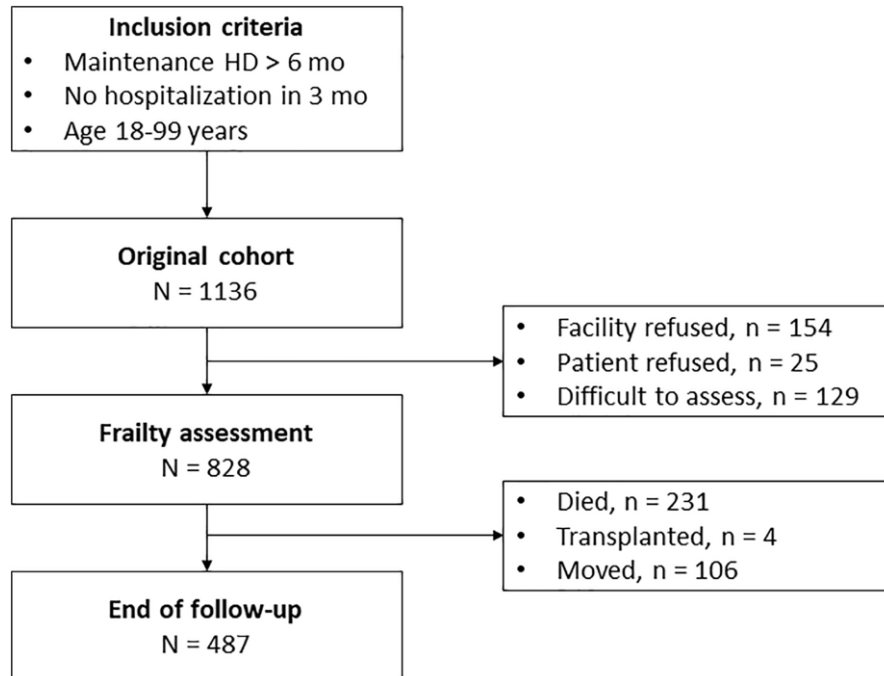

**Supplementary Figure 1. Flow diagram of the study participants.** Abbreviations: HD: hemodialysis; mo: months.
