# Supplementary material for: Association of frailty and chronic limb-threatening ischemia in patients on maintenance hemodialysis: a prospective cohort study
Source: publisher site journal article supplement (doi:10.18632/aging.206178), 2024-12-31
Supplement: Supplementary file [file aging-v16i22-206178-supplementary-material-SD2.pdf]

## SUPPLEMENTARY TABLES

**Supplementary Table 1. Comparison of the characteristics of the study cohort and the 2017 nationwide registry in Taiwan.**

| Factors                     | Study cohort <i>N</i> = 828 | Nationwide registry <i>N</i> = 82031 |
|-----------------------------|-----------------------------|--------------------------------------|
| Age, years                  | 67                          | 67                                   |
| Male sex (%)                | 52%                         | 52%                                  |
| Diabetes (%)                | 53%                         | 45%                                  |
| Hypertension (%)            | 87%                         | 84%                                  |
| Coronary artery disease (%) | 26%                         | 37%                                  |
| Heart failure (%)           | 12%                         | 15%                                  |
| Atrial fibrillation (%)     | 14%                         | 6%                                   |
| Cerebrovascular disease (%) | 9%                          | 12%                                  |
| Hospital-based center (%)   | 55%                         | 62%                                  |
| Albumin, <3.5 g/L           | 12%                         | 18%                                  |
| Hemoglobin, <10 g/dL        | 24%                         | 40%                                  |

**Supplementary Table 2. Logistic regression analysis of variables associated with frailty.**

| Characteristic                       | Univariable     |                     |                 | Multivariable   |                     |                 |
|--------------------------------------|-----------------|---------------------|-----------------|-----------------|---------------------|-----------------|
|                                      | OR <sup>I</sup> | 95% CI <sup>I</sup> | <i>P</i> -value | OR <sup>I</sup> | 95% CI <sup>I</sup> | <i>P</i> -value |
| <b>Demographic factors</b>           |                 |                     |                 |                 |                     |                 |
| Age >65 years                        | 3.01            | 2.22–4.10           | <0.001          | 2.16            | 1.51–3.10           | <0.001          |
| Female sex                           | 1.59            | 1.19–2.13           | 0.002           | 1.41            | 1.03–1.94           | 0.03            |
| <b>BMI groups (kg/m<sup>2</sup>)</b> |                 |                     |                 |                 |                     |                 |
| <18.5                                | —               | —                   |                 |                 |                     |                 |
| 18.5–24                              | 0.70            | 0.45–1.10           | 0.11            |                 |                     |                 |
| 24–27                                | 0.71            | 0.43–1.19           | 0.19            |                 |                     |                 |
| >27                                  | 0.63            | 0.36–1.10           | 0.10            |                 |                     |                 |
| <b>Socioeconomic factors</b>         |                 |                     |                 |                 |                     |                 |
| Education level <6 years             | 2.05            | 1.53–2.76           | <0.001          | 1.20            | 0.85–1.69           | 0.30            |
| Married                              | 0.76            | 0.55–1.07           | 0.11            |                 |                     |                 |
| Current smoker                       | 0.75            | 0.49–1.14           | 0.19            |                 |                     |                 |
| <b>Comorbidities</b>                 |                 |                     |                 |                 |                     |                 |
| DM                                   | 2.10            | 1.56–2.83           | <0.001          | 1.77            | 1.25–2.54           | 0.002           |
| HTN                                  | 0.62            | 0.41–0.92           | 0.02            | 0.81            | 0.51–1.29           | 0.40            |
| Hyperlipidemia                       | 0.78            | 0.55–1.10           | 0.16            |                 |                     |                 |
| CAD                                  | 1.41            | 1.02–1.94           | 0.04            | 1.14            | 0.80–1.62           | 0.50            |
| CVA or ICH                           | 2.11            | 1.31–3.39           | 0.002           | 1.80            | 1.09–2.99           | 0.02            |
| CHF                                  | 1.33            | 0.86–2.03           | 0.19            |                 |                     |                 |
| Atrial fibrillation                  | 1.66            | 1.11–2.48           | 0.01            | 1.52            | 0.99–2.34           | 0.06            |
| COPD                                 | 0.51            | 0.15–1.43           | 0.24            |                 |                     |                 |
| <b>Dialysis factors</b>              |                 |                     |                 |                 |                     |                 |
| Dialysis vintage (years)             | 0.97            | 0.95–1.00           | 0.07            | 1.00            | 0.97–1.04           | 0.80            |

|                     |      |           |        |      |           |      |
|---------------------|------|-----------|--------|------|-----------|------|
| Cholesterol (mg/dL) | 1.00 | 0.99–1.00 | 0.43   |      |           |      |
| Albumin (g/dL)      | 0.30 | 0.19–0.47 | <0.001 | 0.49 | 0.29–0.82 | 0.01 |
| Kt/V (Daugirdas)    | 0.94 | 0.57–1.53 | 0.80   |      |           |      |
| Hb (g/dL)           | 0.88 | 0.79–0.98 | 0.02   | 0.95 | 0.84–1.08 | 0.50 |

<sup>1</sup>OR: Odds Ratio; CI: Confidence Interval. Abbreviations: BMI: body mass index; CAD: coronary artery disease; CHF: congestive heart failure; COPD: chronic obstructive pulmonary disease; CVA: cerebrovascular accident; DM: diabetes mellitus; Hb: hemoglobin; HTN: hypertension; ICH: intracerebral hemorrhage.

**Supplementary Table 3. Mortality and major adverse limb events.**

|               | <b>Overall, N = 828</b> | <b>Not Frail, N = 231</b> | <b>Pre-Frail, N = 317</b> | <b>Frail, N = 280</b> |
|---------------|-------------------------|---------------------------|---------------------------|-----------------------|
| CLTI          | 104 (13%)               | 15 (6.5%)                 | 34 (11%)                  | 55 (20%)              |
| Amputation    | 28 (3%)                 | 2 (1%)                    | 10 (3%)                   | 16 (6%)               |
| Interventions | 101 (12%)               | 15 (7%)                   | 35 (11%)                  | 51 (18%)              |
| MALE          | 108 (13%)               | 16 (7%)                   | 40 (13%)                  | 52 (19%)              |
| Mortality     | 231 (28%)               | 31 (13%)                  | 85 (27%)                  | 115 (41%)             |

Interventions: angioplasty or surgery for peripheral arterial disease. Abbreviations: CLTI: chronic limb-threatening ischemia; MALE: major adverse limb events: a combination of amputation and interventions.
